# Supplementary material for: Polychlorinated Biphenyls in a Ramsar Wetland: Occurrence, Source Apportionment Using PMF, and Probabilistic Human Health and Ecological Risk Assessment in Water and Sediments of Ashtamudi Lake, India
Source: Research Square preprint supplement (doi:10.21203/rs.3.rs-7218664/v1), 2025-07-30
Supplement: Supplementary file 1 [file 3f003bdb705b93192e6ee7ce.docx]

**LIST OF TABLES**

Table 1

Variables considered in the analysis of health risks to humans.

| **Parameters** | **Unit** | **Children** | **Adult** | **Reference** |
| --- | --- | --- | --- | --- |
| Ingestion rate (IRS) | mg/day | 200 | 100 | (USEPA 2001) |
| Exposure frequency (EF) | days/year | 365 | 365 | (Qu et al., 2015) |
| Exposure duration (ED)  SForal (oral slope factor) | Year  (mg/kg day) −1 | 6  2.0 | 30  2.0 | (USEPA 2004)  (USEPA 2016) |
| Body weight (BW) | kg | 15 | 70 | (Adeniji et al., 2019) |
| Average life span (AT) | Days | 25550 | 25550 | (Papadakis et al., 2015) |
| Conversion coefficient (CF)  GIABS (Fractional uptake of PCBs through the digestive system) | kg/mg  unitless | 1 × 10−6  1.00 | 1 × 10−6  1.00 | (Huang et al., 2014)  (USEPA 2016) |
| Skin surface area (SA) | cm2 | 6600 | 18000 | (USEPA 2004) |
| Sediment adsorption coefficient (dermal) (AF) | mg/cm2 | 0.07 | 0.02 | (USEPA 2011) |
| Pollutants adsorption coefficient (dermal) (ABS) | No unit | 0.15 | 0.15 | (USEPA 2016) |

Table 2.

Study on Sediment PCB Profiles in Ashtamudi Wetland Relative to Global Wetland Systems.

| **Study area** | **Concentration range of Ʃ PCBs (µg/kg dw) (mean ± std)** | **Reference** |
| --- | --- | --- |
| Ashtamudi wetland, India | Ʃ6:0.21- 2.99 (0.70) | This study |
| Hugli estuary, India | Ʃ13:0.18-2.33 | Guzzella et al., 2005 |
| East China Sea estuaries | Ʃ9: ND–63 | Adeleye et al., 2016 |
| Haihe Estuary, China | Ʃ32: ND–34.10 | Zhao et al., 2010 |
| Shuangtaizi Estuary | 1.83–36.68 | Yuan et al., 2015 |
| Svalbard, Norwegian Arctic | Ʃ15:0.08–0.59 | Jiao et al., 2009 |
| Shantou, Guangdong, China | Ʃ41: 0.04–0.63 | Ren et al., 2019 |
| Hainan Island, China | Ʃ31: 0.08-0.23 (0.17) | Qiu et al., 2019 a,b |
| Singapore | Ʃ28: 0.683 | Zhang et al., 2015 |
| Moorea island | Ʃ15: 12.03 | Fey et al., 2019 |
| San Blas Bay, Argentina | Ʃ22: 0.02-0.88 (0.40) | Commendatore et al.,2018 |
| Jiulong River Estuary, South China | Ʃ20: 0.52–2.5 | Zhang et al., 2019 |

Table 3.

PCB levels in Ashtamudi Wetland sediments were evaluated against established sediment quality benchmarks, including ISQGs (CCME, 2021), TEL and PEL (MacDonald et al., 1996), and ERL and ERM values (Long et al., 1995).

| **Compounds** | **Concentration (Range) (µg/kg dry w)** | **ISQGs (Interim sediment quality guidelines)** | **TEL (Threshold effect level)** | **PEL (probable effect level)** | **ERL (Effects range low)** | **ERM (Effect range median)** |
| --- | --- | --- | --- | --- | --- | --- |
| ∑PCBs | 0.21-2.99 | 21.5 | 21.6 | 189 | 22.7 | 180 |

Table 4

A summary of the different polychlorinated biphenyl congeners and their possible implications for human health identified in the sediment samples of the Ashtamudi wetland.

| PCBs | HQ by ingestion | | HQ by dermal contact | |
| --- | --- | --- | --- | --- |
| Adults | Children | Adults | Children |
| PCB28 | 0.006 | 0.010 | 0.012 | 0.001 |
| PCB52 | 0.002 | 0.002 | 0.003 | 0.0002 |
| PCB101 | 0.003 | 0.005 | 0.006 | 0.0005 |
| PCB138 | 0.006 | 0.010 | 0.012 | 0.0010 |
| PCB153 | 0.004 | 0.006 | 0.007 | 0.0006 |
| PCB180 | 0.001 | 0.001 | 0.002 | 0.0001 |
| HI | 0.022 | 0.036 | 0.042 | 0.0035 |

Table 5

Cancer risks linked to different PCBs present in the sediments of Ashtamudi wetland.

| PCBs | CRingestion  (Adults) | CRingestion(Children) | CRdermal(Adults) | CRdermal(Children) |
| --- | --- | --- | --- | --- |
| PCB28 | 2.57E-07 | 4.8E-07 | 4.86E-13 | 4.75E-08 |
| PCB52 | 6.12E-08 | 1.14E-07 | 1.16E-13 | 1.13E-08 |
| PCB101 | 1.22E-07 | 2.29E-07 | 2.31E-13 | 2.26E-08 |
| PCB138 | 2.57E-07 | 4.8E-07 | 4.86E-13 | 4.75E-08 |
| PCB153 | 1.47E-07 | 2.74E-07 | 2.78E-13 | 2.72E-08 |
| PCB180 | 3.67E-08 | 6.86E-08 | 6.94E-14 | 6.79E-09 |
