# Supplementary material for: Polychlorinated Biphenyls in a Ramsar Wetland: Occurrence, Source Apportionment Using PMF, and Probabilistic Human Health and Ecological Risk Assessment in Water and Sediments of Ashtamudi Lake, India
Source: Research Square preprint supplement (doi:10.21203/rs.3.rs-7218664/v1), 2025-07-30
Supplement: Supplementary file 2 [file ad2725c2acd89d09ba39ee3b.docx]

**SUPPLEMENTARY MATERIALS**

**Polychlorinated Biphenyls in a Ramsar Wetland: Occurrence, Source Apportionment Using PMF, and Probabilistic Human Health and Ecological Risk Assessment in Water and Sediments of Ashtamudi Lake, India.**

M A Sreedevi a, b,P S Harikumar a, *

Table S1.

Measured concentrations of PCBs (µg/kg) in procedural blanks and certified reference material (CRM CNS 391)

| Compound | Blank | CRM | Measured | Recovery (%) | LOD | LOQ |
| --- | --- | --- | --- | --- | --- | --- |
| PCB28 | BDL | 43.9 ± 2.31 | 36.5 | 83 | 0.03 | 0.08 |
| PCB52 | BDL | 64.2 ± 3.23 | 59.8 | 93 | 0.02 | 0.05 |
| PCB101 | BDL | 45 ± 2.13 | 43.6 | 97 | 0.01 | 0.07 |
| PCB138 | BDL | 35.32 ± 3.43 | 31.2 | 88 | 0.03 | 0.02 |
| PCB153 | BDL | 49 ± 1.79 | 40.9 | 83 | 0.02 | 0.04 |
| PCB180 | BDL | 54.4 ± 2.51 | 52.3 | 96 | 0.01 | 0.05 |

BDL: Below detection limit, LOD: Limit of Detection, LOQ: Limit of Quantitation.
